# Supplementary material for: Endogenous Fluorescent Proteins in the Mucus of an Intertidal Polychaeta: Clues for Biotechnology
Source: MDPI journal article supplement (doi:10.3390/md20040224), 2022-03-25
Supplement: s1 [file s1]

# Endogenous fluorescent proteins in the mucus of an intertidal Polychaeta: Clues for biotechnology

## Supplementary Material

**Ana P. Rodrigo <sup>1,2,\*</sup>, Ana Lopes <sup>1</sup>, Ricardo Pereira <sup>1</sup>, Sandra I. Anjo <sup>3</sup>, Bruno Manadas <sup>3</sup>, Ana R. Grosso <sup>1,2</sup>, Pedro V. Baptista <sup>1,2</sup>, Alexandra R. Fernandes <sup>1,2</sup> and Pedro M. Costa <sup>1,2,\*</sup>**

<sup>1</sup> UCIBIO—Applied Molecular Biosciences Unit, Department of Life Sciences, NOVA School of Science and Technology, Universidade NOVA de Lisboa, 2829-516 Caparica, Portugal; arc.lopes@campus.fct.unl.pt (A.L.); rb.pereira@campus.fct.unl.pt (R.P.); ar.grosso@fct.unl.pt (A.R.G.); pmvb@fct.unl.pt (P.V.B.); ma.fernandes@fct.unl.pt (A.R.F.)

<sup>2</sup> Associate Laboratory i4HB, Institute for Health and Bioeconomy, NOVA School of Science and Technology, Universidade NOVA de Lisboa, 2829-516 Caparica, Portugal

<sup>3</sup> Center for Neuroscience and Cell Biology, University of Coimbra, Parque Tecnológico de Cantanhede, Núcleo 04, Lote 8, 3060-197 Cantanhede, Portugal; sandra.isabel.anjo@gmail.com (S.I.A.); bmanadas@gmail.com (B.M.)

\* Correspondence: a.rodrigo@campus.fct.unl.pt (A.P.R.); pmcosta@fct.unl.pt (P.M.C.); Tel.: +351-212-948-300 (NOVA School)

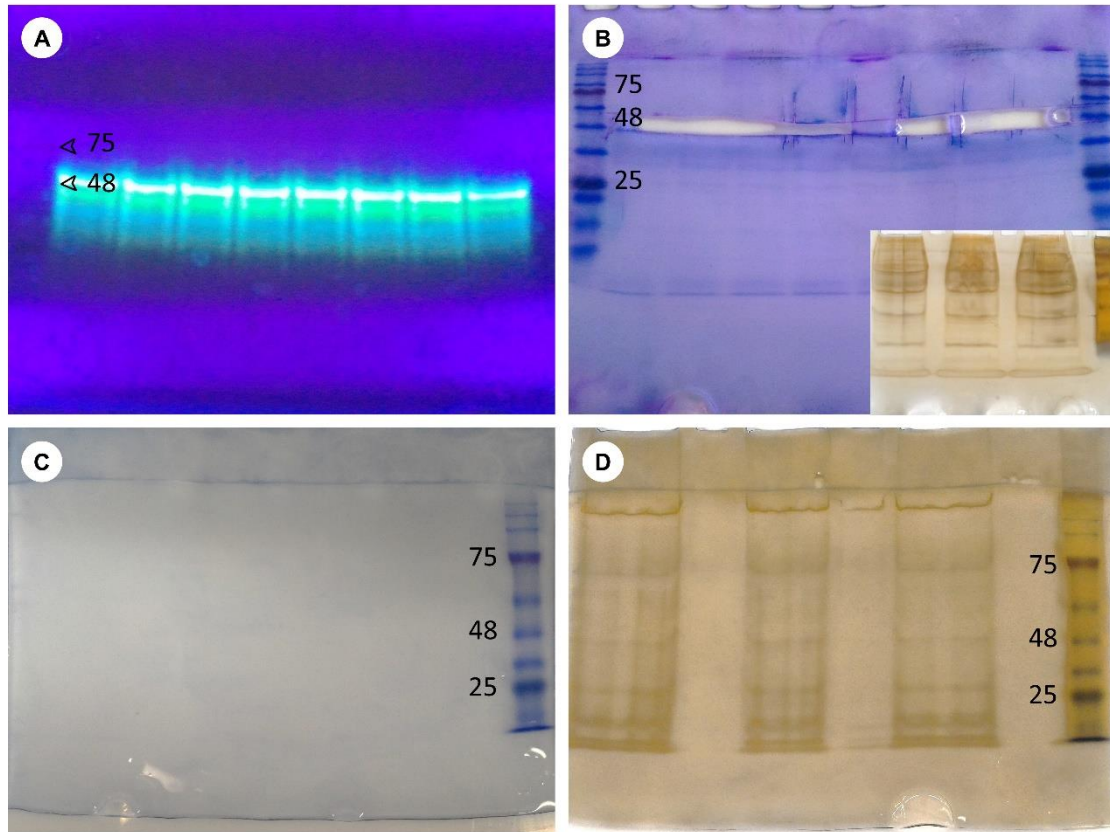

**Figure S1.** Gel electrophoresis of crude protein extracts purified by ultrafiltration. (a, b) The same SDS-PAGE gel showing fluorescent bands under UV-light, followed by excision for MS/MS analysis and staining with Coomassie Blue. *Inset:* SDS-PAGE gel colored by silver staining. (c, d) The same native PAGE gel stained by Coomassie blue, followed by silver staining, respectively.

**Table S1.** Protein identification by homology matching using BLASTP.

| Protein              | Origin  | Conserved domain (Pfam)                   | Protein match                                                | Query cover | e-value (Blastp)     |
|----------------------|---------|-------------------------------------------|--------------------------------------------------------------|-------------|----------------------|
| <b>Polyubiquitin</b> | RNA-seq | Ubiquitin-like domain                     | Polyubiquitin-B ( <i>Nematostella vectensis</i> )            | 100%        | 1×10 <sup>-88</sup>  |
|                      | MS-MS   | Ubiquitin-like domain                     | Polyubiquitin-C ( <i>Nematostella vectensis</i> )            | 100%        | 9×10 <sup>-10</sup>  |
| <b>Peroxiredoxin</b> | RNA-seq | Peroxiredoxin family, 2-Cys PRX subfamily | Peroxiredoxin-1 ( <i>Theropithecus gelada</i> )              | 94%         | 2×10 <sup>-147</sup> |
|                      | MS-MS   | Tryparedoxin peroxidase                   | Peroxiredoxin-1-like ( <i>Dendronephthya gigantea</i> )      | 100%        | 1×10 <sup>-04</sup>  |
| <b>14-3-3</b>        | RNA-seq | 14-3-3 superfamily                        | 14-3-3 zeta ( <i>Pristionchus pacificus</i> )                | 95%         | 3×10 <sup>-121</sup> |
|                      | MS-MS   | -                                         | 14-3-3 protein beta/alpha-A ( <i>Stylophora pistillata</i> ) | 100%        | 6×10 <sup>-04</sup>  |

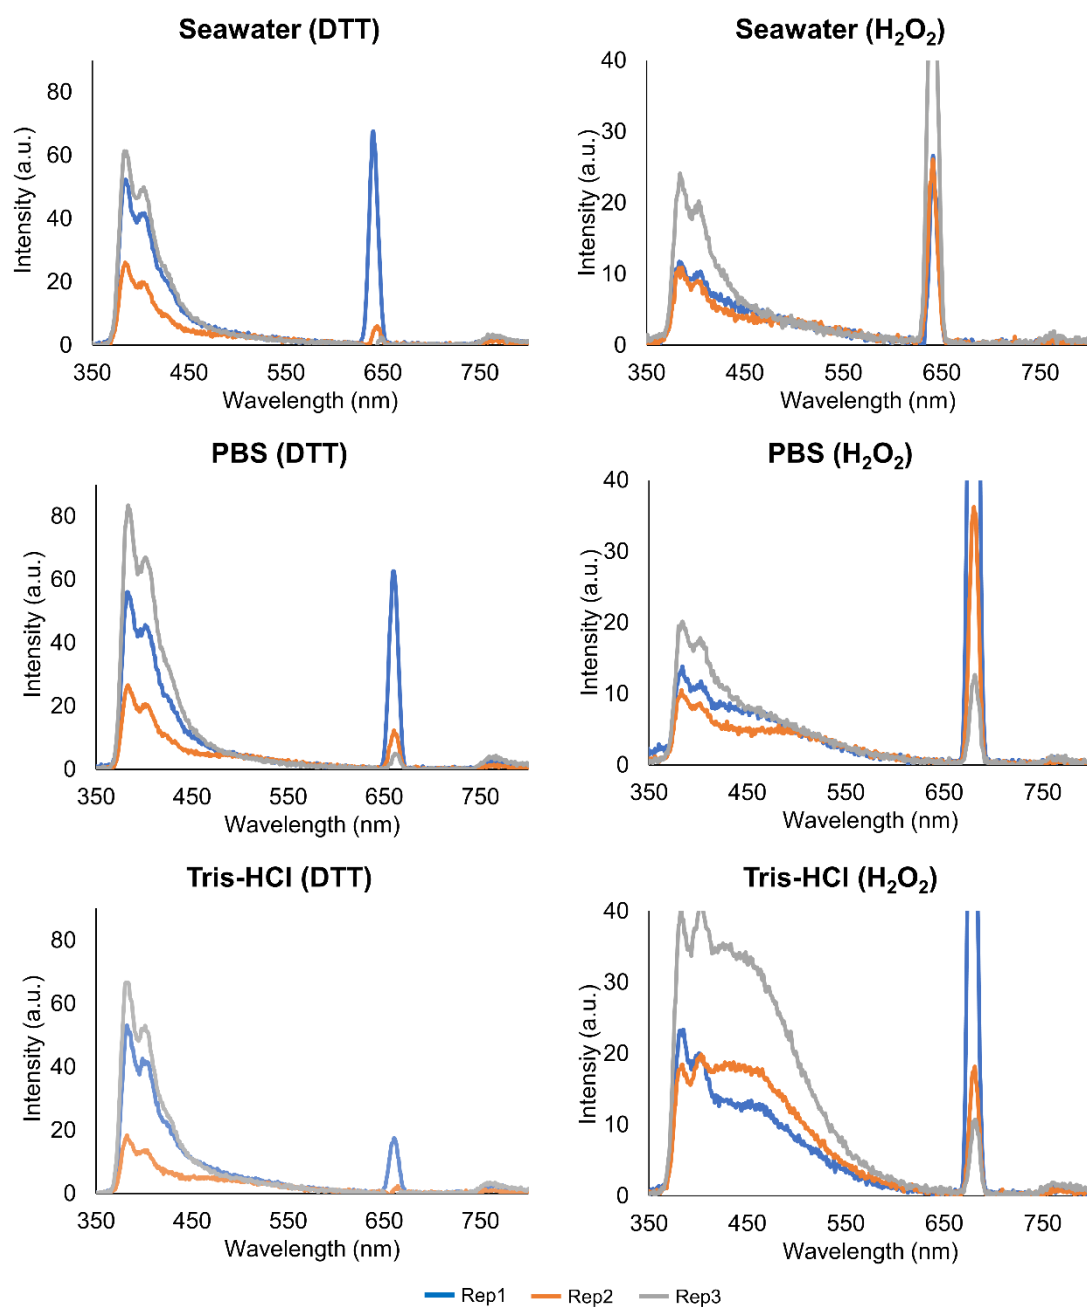

**Figure S2.** Emission spectra of crude mucus samples in different buffers (Seawater, PBS and Tris-HCl, pH 7) and redox treatments ( $\text{H}_2\text{O}_2$  and DTT). Samples were excited at 320-340 nm. Rep1 to Rep3 indicate the three independent replicates. Concentration of extracts was normalised to 1 mg total protein.  $\text{mL}^{-1}$ .

**Table S2.** Averaged peak maximum intensities and respective wavelengths of the emission spectra in crude mucus samples. Samples were excited at 260 and 320-340 nm for oxidised (H<sub>2</sub>O<sub>2</sub>) and reduced samples (DTT). Experiments were done in triplicate with independent extracts.

| Buffer                                   | Excitation (nm) | Emission max (nm) | Intensity max (a.u.) | SD (a.u.) |
|------------------------------------------|-----------------|-------------------|----------------------|-----------|
| Seawater + H <sub>2</sub> O <sub>2</sub> | 255             | 384               | 8.36                 | 2.66      |
|                                          |                 | 400               | 7.37                 | 2.11      |
|                                          | 340             | 383               | 15.08                | 4.71      |
|                                          |                 | 403               | 13.07                | 3.95      |
| PBS + H <sub>2</sub> O <sub>2</sub>      | 250             | 385               | 7.2                  | 2.9       |
|                                          |                 | 401               | 6.18                 | 2.16      |
|                                          | 340             | 384               | 15.25                | 3.76      |
|                                          |                 | 402               | 12.97                | 3.73      |
| Tris-HCl + H <sub>2</sub> O <sub>2</sub> | 250             | 384               | 10.10                | 3.96      |
|                                          |                 | 401               | 8.63                 | 3.44      |
|                                          | 340             | 383               | 27.23                | 9.33      |
|                                          |                 | 403               | 26.66                | 9.83      |
| Seawater + DTT                           | 255             | 384               | 55.74                | 15.49     |
|                                          |                 | 402               | 44.72                | 12.76     |
|                                          | 340             | 385               | 44.06                | 15.67     |
|                                          |                 | 402               | 35.84                | 12.89     |
| PBS + DTT                                | 260             | 384               | 70.36                | 26.65     |
|                                          |                 | 404               | 55.89                | 21.75     |
|                                          | 330             | 384               | 57.04                | 23.1      |
|                                          |                 | 403               | 45.76                | 18.86     |
| Tris-HCl + DTT                           | 260             | 384               | 50.21                | 21.31     |
|                                          |                 | 403               | 39.09                | 17.02     |
|                                          | 330             | 383               | 47.83                | 20.99     |
|                                          |                 | 402               | 37.69                | 17.11     |

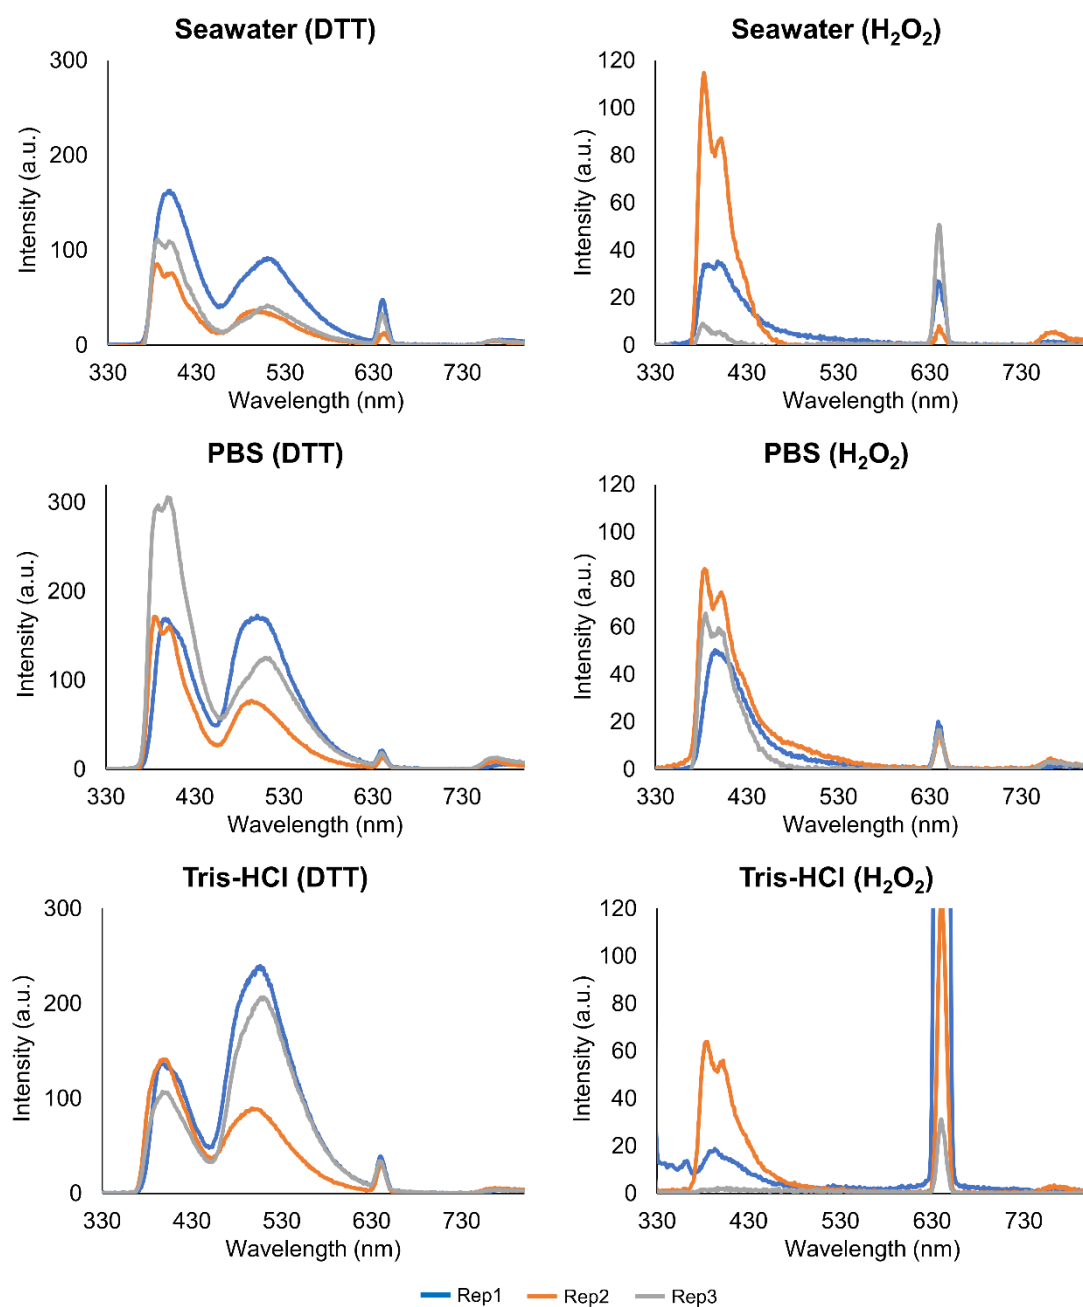

**Figure S3.** Emission spectra of purified mucus samples in different buffers (Seawater, PBS and Tris-HCl, pH 7) and redox treatments ( $\text{H}_2\text{O}_2$  and DTT). Samples were excited at 320 nm. Rep1 to Rep3 indicate three the independent replicates. Concentration of extracts was normalised to 1 mg total protein.  $\text{mL}^{-1}$ .

**Table S3.** Averaged peak maximum intensities and respective wavelengths of the emission spectra in purified mucus samples. Samples were excited at 286 and 320 nm for oxidised samples (H<sub>2</sub>O<sub>2</sub>) and at 260, 286 and 320 nm for reduced samples (DTT). Experiments were done in triplicate with independent extracts.

| Buffer                                   | Excitation (nm) | Emission max (nm) | Intensity max (a.u.) | SD (a.u.) |
|------------------------------------------|-----------------|-------------------|----------------------|-----------|
| Seawater + H <sub>2</sub> O <sub>2</sub> | 286             | 382               | 67.69                | 50.74     |
|                                          |                 | 400               | 55.53                | 38.22     |
|                                          | 320             | 382               | 52.36                | 45.31     |
|                                          |                 | 400               | 42.15                | 33.65     |
| PBS + H <sub>2</sub> O <sub>2</sub>      | 286             | 386               | 60.59                | 13.23     |
|                                          |                 | 399               | 59.18                | 6.44      |
|                                          | 320             | 385               | 61.43                | 18.97     |
|                                          |                 | 400               | 60.56                | 10.44     |
| Tris-HCl + H <sub>2</sub> O <sub>2</sub> | 286             | 383               | 31.94                | 32.79     |
|                                          |                 | 398               | 28.08                | 26.79     |
|                                          | 320             | 384               | 26.94                | 26.78     |
|                                          |                 | 399               | 24.50                | 22.48     |
| Seawater + DTT                           | 260             | 402               | 199.93               | 69.09     |
|                                          |                 | 509               | 54.71                | 24.31     |
|                                          | 286             | 399               | 170.84               | 58.94     |
|                                          |                 | 510               | 44.34                | 18.19     |
|                                          | 320             | 398               | 115.92               | 35.74     |
|                                          |                 | 509               | 55.99                | 25.76     |
| PBS + DTT                                | 260             | 399               | 328.62               | 128.22    |
|                                          |                 | 511               | 100.54               | 32.74     |
|                                          | 286             | 399               | 290.00               | 108.44    |
|                                          |                 | 510               | 77.64                | 22.00     |
|                                          | 320             | 398               | 210.76               | 67.13     |
|                                          |                 | 509               | 120.46               | 40.89     |
| Tris-HCl + DTT                           | 260             | 398               | 204.66               | 18.78     |
|                                          |                 | 508               | 174.26               | 29.23     |
|                                          | 286             | 398               | 185.33               | 20.28     |
|                                          |                 | 509               | 133.98               | 25.82     |
|                                          | 320             | 396               | 128.31               | 15.14     |
|                                          |                 | 505               | 177.49               | 65.43     |

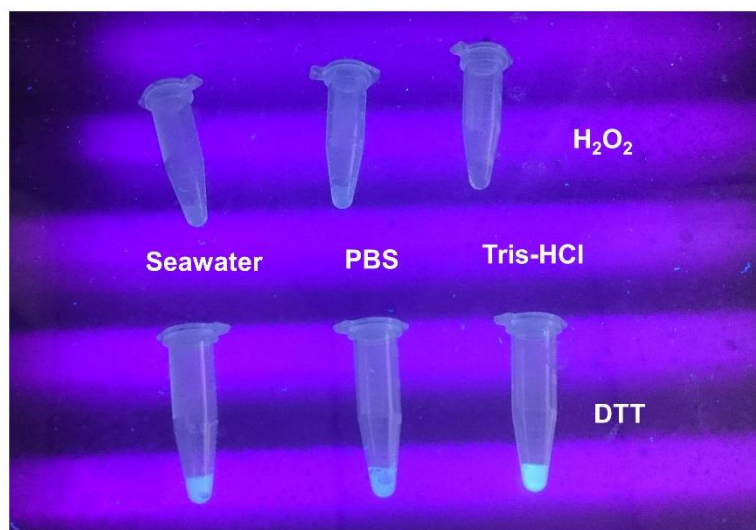

**Figure S4.** Fluorescence of purified mucus samples in different buffers (Seawater, PBS and Tris-HCl pH7) and treated with redox agents (H<sub>2</sub>O<sub>2</sub> and DTT), under UV-light. The blue-greenish fluorescence is notorious in all samples treated with DTT.



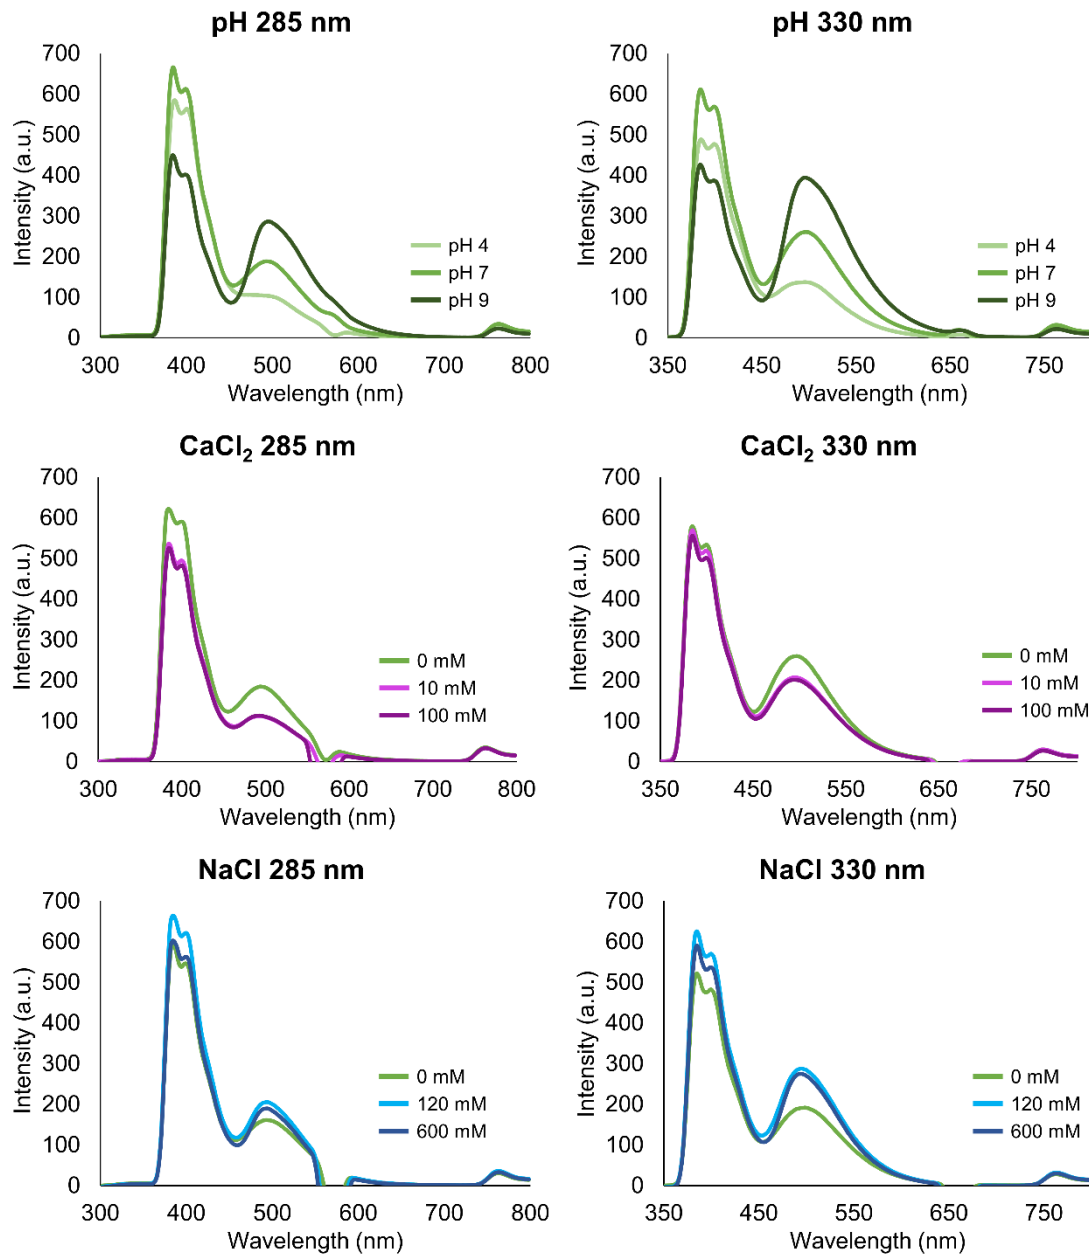

**Figure S5.** Averaged absolute intensity emission spectra of purified mucus samples excited at 285 nm and 330 nm. Samples were kept in Tris-HCl, 20 mM DTT buffer and modulated according to: pH (4, 7 and 9), calcium chloride (0, 10 and 100 mM CaCl<sub>2</sub>), sodium chloride (0, 120 and 600 mM NaCl). Experiments were done in triplicate with independent extracts. Concentration of extracts was normalised to 1 mg total protein. mL<sup>-1</sup>.

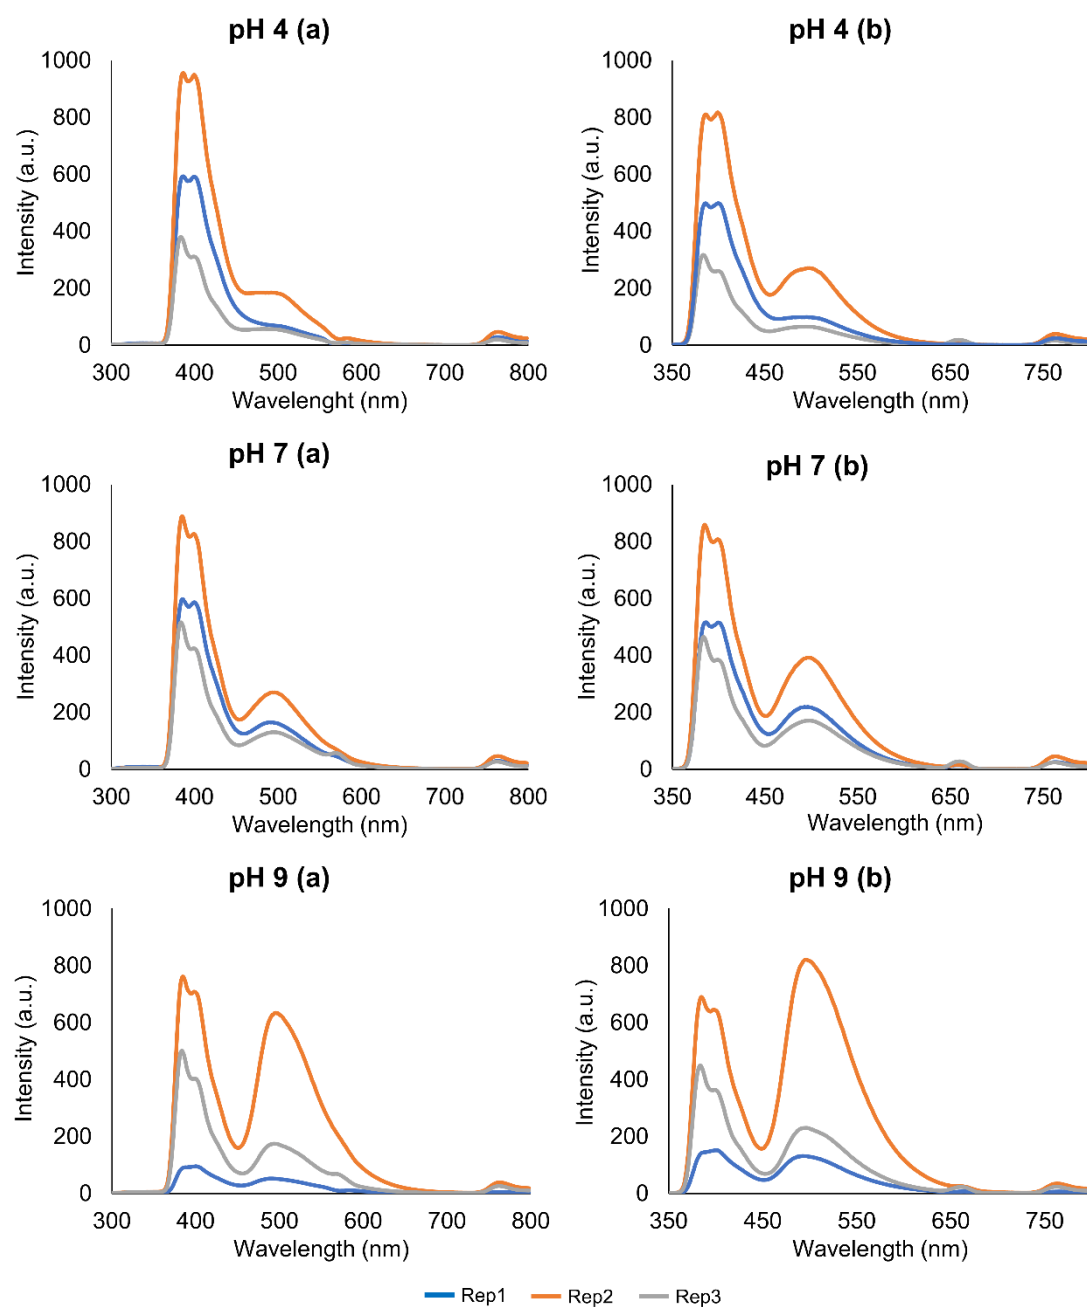

**Figure S6.** Emission spectra of reduced purified mucus samples (Tris-HCl plus DTT buffer), at different pH (pH 4, 7 and 9). Samples were excited at 285 (a) and 330 nm (b). Rep1 to Rep3 indicate three the independent replicates. Concentration of extracts was normalised to 1 mg total protein. mL<sup>-1</sup>.

**Table S4.** Averaged maximum intensities and respective wavelengths of purified mucus samples (Tris-HCl plus DTT buffer) in the peaks identified in the emission spectra excited at 285 and 330 nm, at different pH levels. Experiments were done in triplicate with independent extracts.

| Buffer           | Excitation (nm) | Emission max (nm) | Intensity max (a.u.) | SD (a.u.) |
|------------------|-----------------|-------------------|----------------------|-----------|
| Tris-HCl<br>pH 4 | 285             | 385               | 584.32               | 261.50    |
|                  |                 | 399               | 563.43               | 277.27    |
|                  |                 | 491               | 103.90               | 57.76     |
|                  | 330             | 385               | 487.95               | 225.89    |
|                  |                 | 399               | 476.81               | 243.76    |
|                  |                 | 496               | 137.17               | 94.42     |
| Tris-HCl<br>pH 7 | 285             | 384               | 665.07               | 159.75    |
|                  |                 | 399               | 563.43               | 277.27    |
|                  |                 | 493               | 188.51               | 59.35     |
|                  | 330             | 385               | 611.53               | 176.25    |
|                  |                 | 399               | 569.30               | 176.88    |
|                  |                 | 496               | 260.59               | 94.94     |
| Tris-HCl<br>pH 9 | 285             | 384               | 449.54               | 276.42    |
|                  |                 | 399               | 563.43               | 277.27    |
|                  |                 | 495               | 286.66               | 250.73    |
|                  | 330             | 385               | 425.88               | 224.15    |
|                  |                 | 399               | 386.75               | 201.95    |
|                  |                 | 496               | 394.28               | 304.50    |

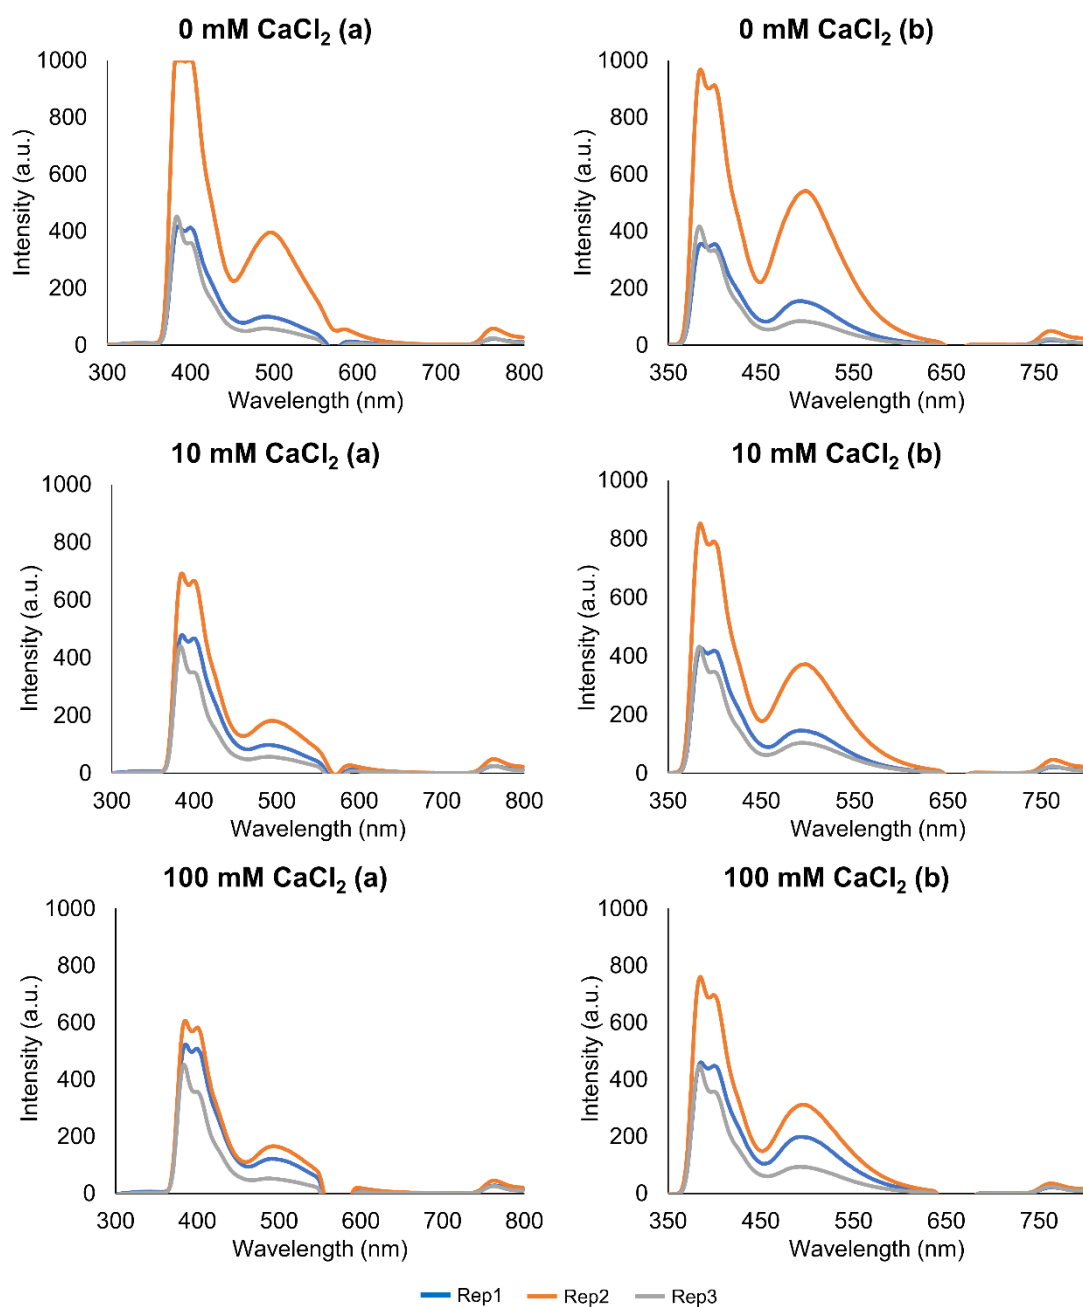

**Figure S7.** Emission spectra of purified mucus samples (Tris-HCl pH 7 plus DTT buffer), with different concentrations of  $\text{CaCl}_2$  (0, 10 and 100 mM). Rep1 to Rep3 indicate three the independent replicates. Concentration of extracts was normalised to 1 mg total protein.  $\text{mL}^{-1}$ . Samples were excited 285 (a) and 330 nm (b).

**Table S5.** Averaged maximum intensities and respective wavelengths of purified mucus samples (Tris-HCl pH 7 buffer) with different CaCl<sub>2</sub> concentrations (0, 10 and 100 mM). Samples were excited at 285 and 330 nm. Experiments were done in triplicate with independent extracts.

| Buffer                      | Excitation (nm) | Emission max (nm) | Intensity max (a.u.) | SD (a.u.) |
|-----------------------------|-----------------|-------------------|----------------------|-----------|
| CaCl <sub>2</sub><br>0 mM   | 285             | 384               | 621.73               | 267.38    |
|                             |                 | 399               | 590.24               | 290.15    |
|                             |                 | 494               | 184.65               | 150.16    |
|                             | 330             | 385               | 578.66               | 276.09    |
|                             |                 | 400               | 533.81               | 268.05    |
|                             |                 | 497               | 259.66               | 201.36    |
| CaCl <sub>2</sub><br>10 mM  | 285             | 384               | 535.60               | 110.46    |
|                             |                 | 399               | 494.40               | 130.45    |
|                             |                 | 491               | 111.97               | 51.41     |
|                             | 330             | 385               | 568.89               | 200.12    |
|                             |                 | 399               | 519.08               | 194.72    |
|                             |                 | 497               | 206.77               | 118.04    |
| CaCl <sub>2</sub><br>100 mM | 285             | 385               | 525.30               | 64.87     |
|                             |                 | 400               | 482.79               | 93.96     |
|                             |                 | 492               | 113.14               | 46.99     |
|                             | 330             | 385               | 555.29               | 145.34    |
|                             |                 | 399               | 501.10               | 143.44    |
|                             |                 | 494               | 201.26               | 89.01     |

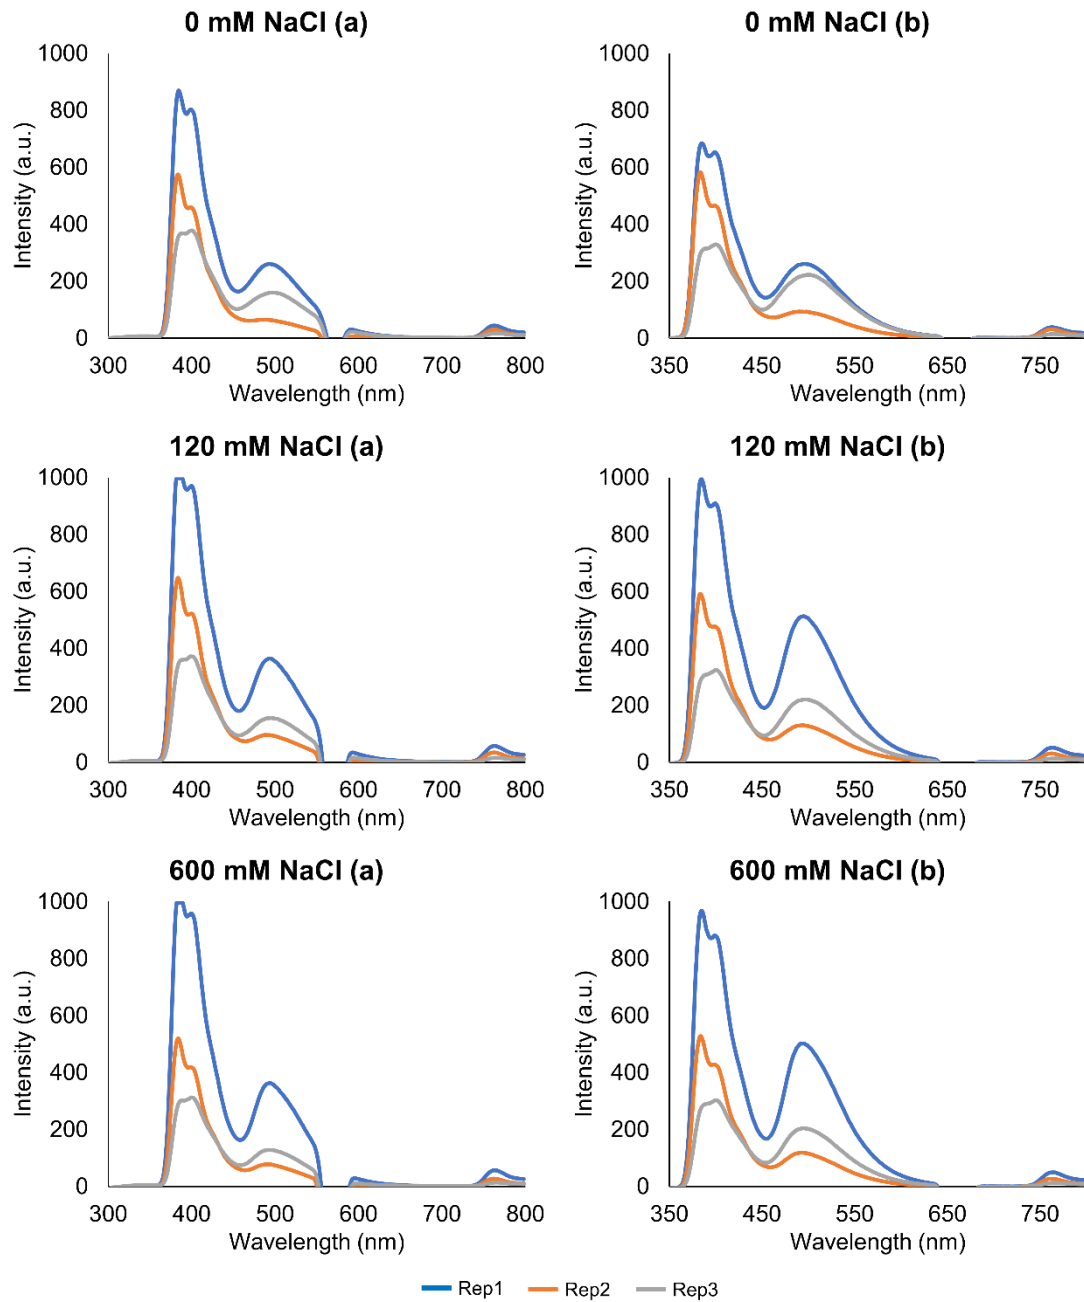

**Figure S8.** Emission spectra of purified mucus samples (Tris-HCl pH 7 plus DTT buffer), with different concentrations of NaCl (0, 120 and 600 mM). Rep1 to Rep3 indicate three the independent replicates. Concentration of extracts was normalised to 1 mg total protein. mL<sup>-1</sup>. Samples were excited at 285 (a) and 330 nm (b).

**Table S6.** Averaged maximum intensities and respective peaks wavelengths for purified mucus samples (Tris-HCl pH 7 plus DTT buffer), with different NaCl concentrations (0, 120 and 600 mM). Samples were excited at 285 and 330 nm. Experiments were done in triplicate with independent extracts.

| Buffer         | Excitation (nm) | Emission max (nm) | Intensity max (a.u.) | SD (a.u.) |
|----------------|-----------------|-------------------|----------------------|-----------|
| NaCl<br>0 mM   | 285             | 384               | 600.12               | 209.76    |
|                |                 | 399               | 546.57               | 184.32    |
|                |                 | 493               | 161.31               | 80.28     |
|                | 330             | 385               | 521.70               | 158.95    |
|                |                 | 399               | 482.19               | 132.77    |
|                |                 | 498               | 191.62               | 71.40     |
| NaCl<br>120 mM | 285             | 384               | 663.70               | 266.21    |
|                |                 | 399               | 621.27               | 254.07    |
|                |                 | 493               | 205.23               | 115.14    |
|                | 330             | 385               | 624.94               | 286.40    |
|                |                 | 400               | 569.84               | 247.67    |
|                |                 | 495               | 287.85               | 163.43    |
| NaCl<br>600 mM | 285             | 384               | 602.35               | 294.37    |
|                |                 | 399               | 563.08               | 283.23    |
|                |                 | 494               | 189.59               | 124.79    |
|                | 330             | 385               | 590.16               | 285.23    |
|                |                 | 399               | 536.71               | 248.75    |
|                |                 | 495               | 274.86               | 164.49    |

**Table S7.** Averaged emission maximum peaks wavelengths, excited at different wavelengths (285, 330 and 374) for purified mucus samples. Samples were in different buffers treated with DTT (Seawater, PBS and Tris-HCl pH 7), different pHs (pH 4, 7 and 9 in Tris-HCl 20 mM DTT buffer), different CaCl<sub>2</sub> concentrations (0, 10 and 100 mM in Tris-HCl 20 mM DTT pH 7) and different NaCl concentrations (0, 120 and 600 mM in Tris-HCl 20 mM DTT pH 7). Experiments were done in triplicate with independent extracts.

|                               |          | Fluorescence emission maxima wavelengths (nm) |        |        |
|-------------------------------|----------|-----------------------------------------------|--------|--------|
|                               |          | Excitation Wavelength                         |        |        |
|                               |          | 285 nm                                        | 330 nm | 374 nm |
| <b>Buffer</b><br><b>(DTT)</b> | Seawater | 513                                           | 507    | 509    |
|                               | PBS      | 510                                           | 504    | 507    |
|                               | Tris-HCl | 509                                           | 505    | 507    |
| <b>pH</b>                     | 4        | 492                                           | 496    | 486    |
|                               | 7        | 493                                           | 496    | 493    |
|                               | 9        | 495                                           | 496    | 495    |
| <b>CaCl<sub>2</sub></b>       | 0 mM     | 494                                           | 497    | 495    |
|                               | 10 mM    | 491                                           | 497    | 494    |
|                               | 100 mM   | 493                                           | 496    | 490    |
| <b>NaCl</b>                   | 0 mM     | 493                                           | 499    | 493    |
|                               | 10 mM    | 493                                           | 495    | 494    |
|                               | 100 mM   | 494                                           | 495    | 494    |



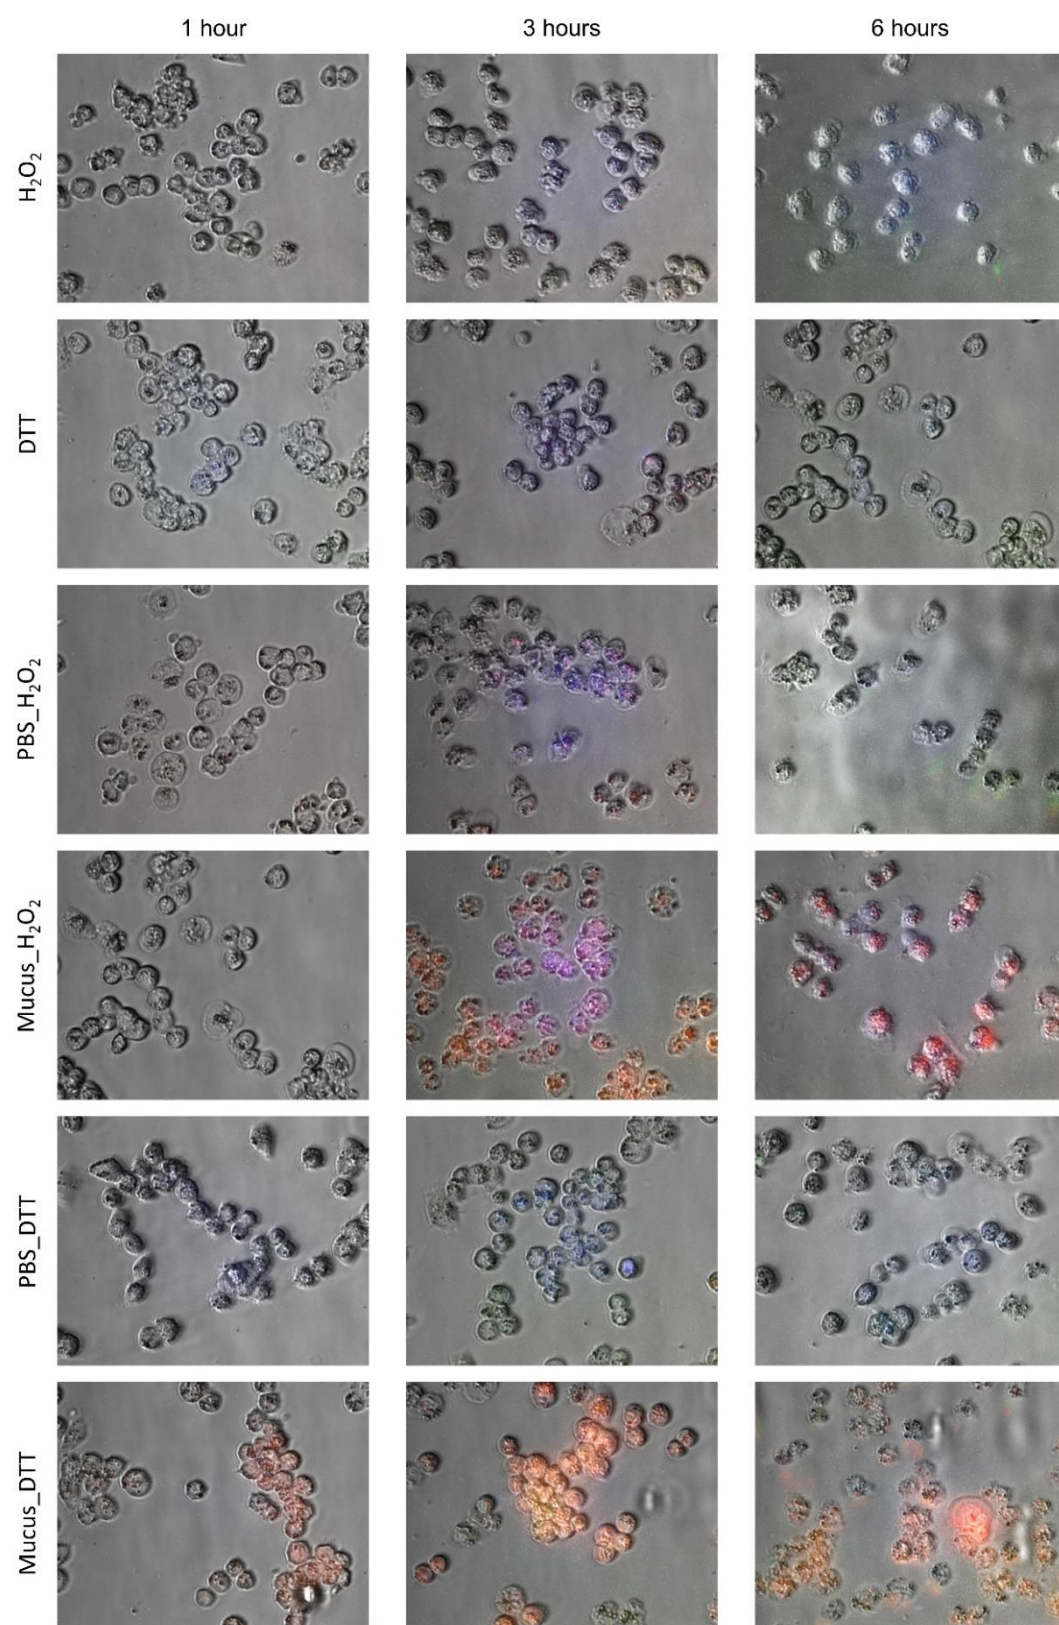

**Figure S9.** Internalisation assay for purified mucosubstances onto the ovarian cancer cell line A2780. Cells were incubated during 1 h, 3 h and 6 h with purified mucus extract prepared with PBS (pH 7.4) and the respective control (PBS). Either experimental condition was subjected to

reduced or oxidizing agents (DTT and  $\text{H}_2\text{O}_2$ ). Composite images were produced by overlapping red, green and blue channels with brightfield images.
